# Supplementary material for: Au decoration of a graphene microchannel for self-activated chemoresistive flexible gas sensors with substantially enhanced response to hydrogen
Source: Royal Society of Chemistry journal article supplement (doi:10.1039/c8nr09076a), 2019-01-01
Supplement: c8nr09076a1.pdf [file c8nr09076a1.pdf]

## Electronic Supplementary Information

### **Au decoration of graphene microchannel for self-activated chemoresistive flexible gas sensors with substantially enhanced response to hydrogen**

Yeonhoo Kim,<sup>ab</sup> Yong Seok Choi,<sup>c</sup> Seo Yun Park,<sup>a</sup> Taehoon Kim,<sup>a</sup> Seung-Pyo Hong,<sup>a</sup> Tae Hyung Lee,<sup>a</sup> Cheon Woo Moon,<sup>d</sup> Jong-Heun Lee,<sup>e</sup> Donghwa Lee,<sup>\*f</sup> Byung Hee Hong,<sup>\*c</sup> and Ho Won Jang<sup>\*a</sup>

<sup>a</sup>Department of Materials Science and Engineering, Research Institute of Advanced Materials, Seoul National University, Seoul 08826, Republic of Korea. E-mail: hwjang@snu.ac.kr

<sup>b</sup>Center for Integrated Nanotechnologies, Los Alamos National Laboratory, Los Alamos, NM 87544, United States of America.

<sup>c</sup>Department of Chemistry, Seoul National University, Seoul 08826, Republic of Korea. E-mail: byunghee@snu.ac.kr

<sup>d</sup>Department of Chemistry and Nanoscience, Ewha Womans University, Seoul 03760, Republic of Korea.

<sup>e</sup>Department of Materials Science and Engineering, Korea University, Seoul 02841, Republic of Korea.

<sup>f</sup>Department of Materials Science and Engineering, and Division of Advanced Materials Science, Pohang University of Science and Technology, Pohang, Gyeongbuk 37673, Republic of Korea. E-mail: donghwa96@postech.ac.kr

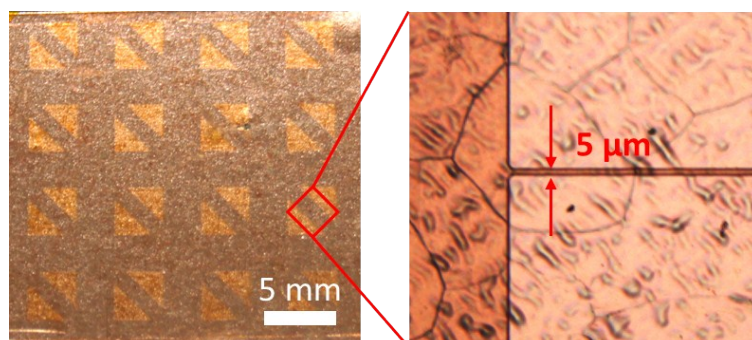

**Figure S1.** Micro patterning of 3LG grown on a Cu foil.

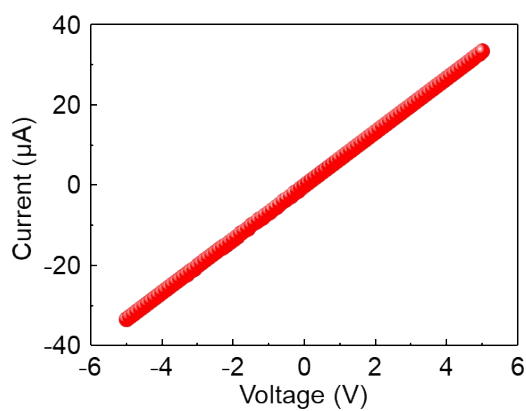

**Figure S2.** I-V characteristic of Au decorated graphene sensor

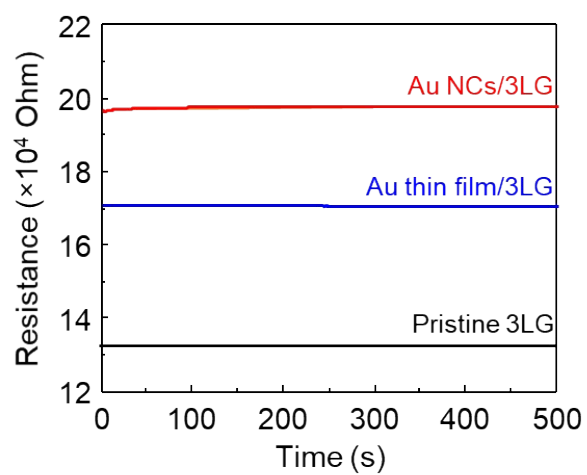

**Figure S3.** Resistance of pristine 3LG, Au thin film/3LG (before formation of Au NCs), and Au NCs/3LG.

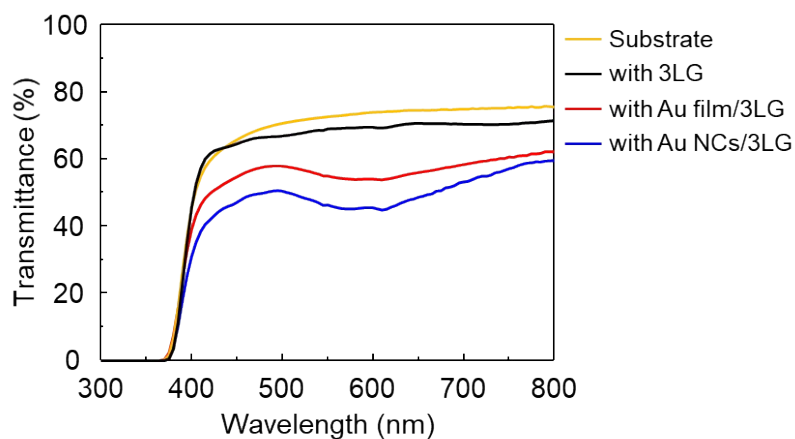

**Figure S4.** UV-vis transmittance spectra of the PI substrate, the substrate with 3LG, Au film/3LG (before formation of Au NCs), and Au NCs/3LG.

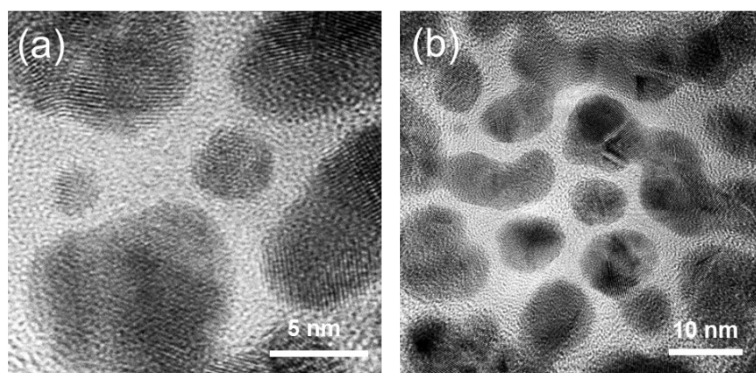

**Figure S5.** TEM images of Au decorated 3LG at different magnifications.

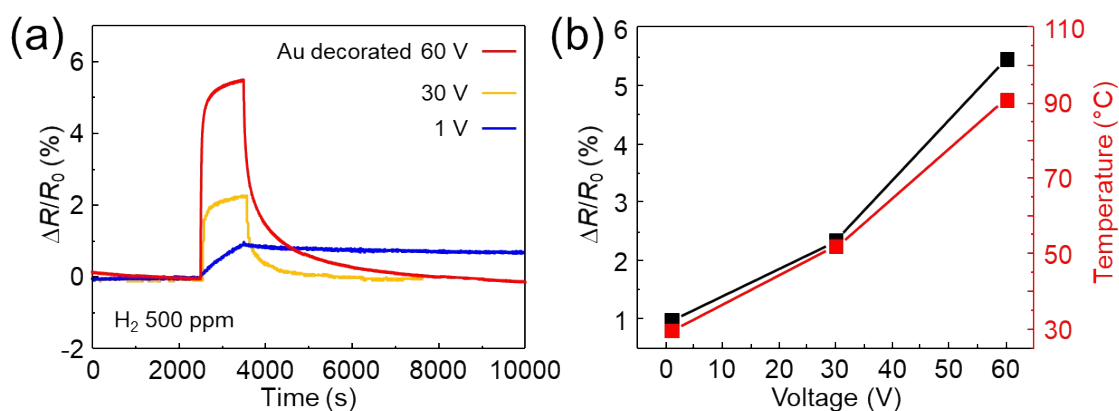

**Figure S6.** (a) H<sub>2</sub> gas sensing curves at different voltages. (b) Relationship between gas responses and temperatures according to the applied bias voltages.

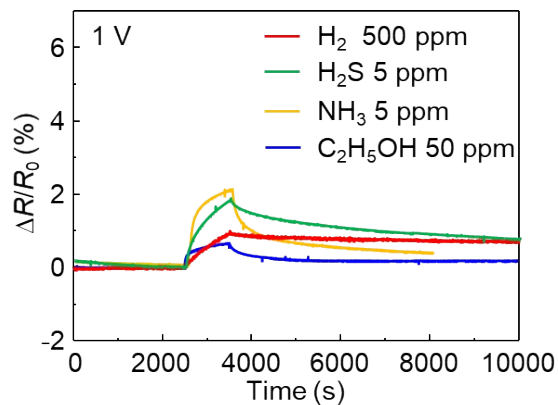

**Figure S7.** Sensing curves of the Au decorated graphene sensor at 1 V

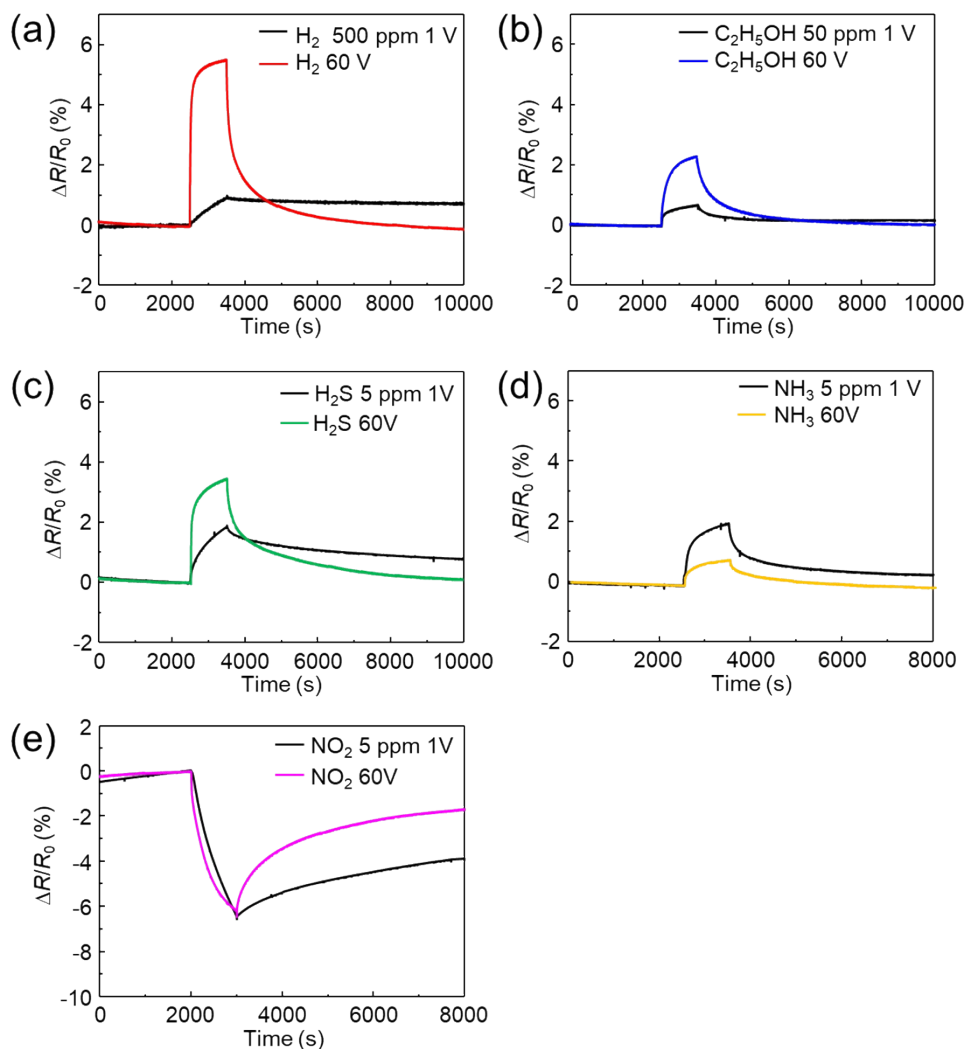

**Figure S8.** Comparison of the sensing properties of Au decorated graphene sensor at bias voltage of 1 and 60 V to H<sub>2</sub>, C<sub>2</sub>H<sub>5</sub>OH, H<sub>2</sub>S, NH<sub>3</sub>, and NO<sub>2</sub> gas.

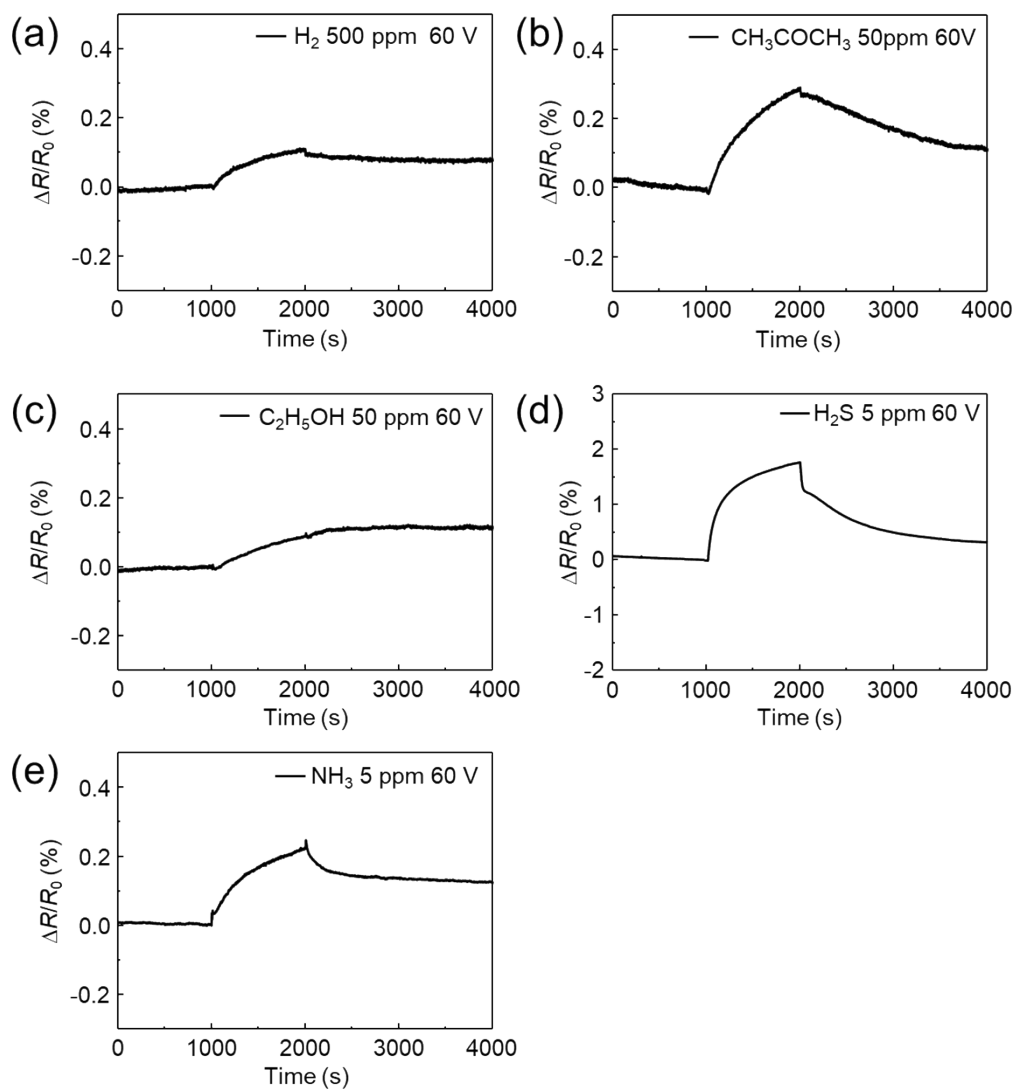

**Figure S9.** Response curves of pristine graphene sensor upon exposure to different gases.

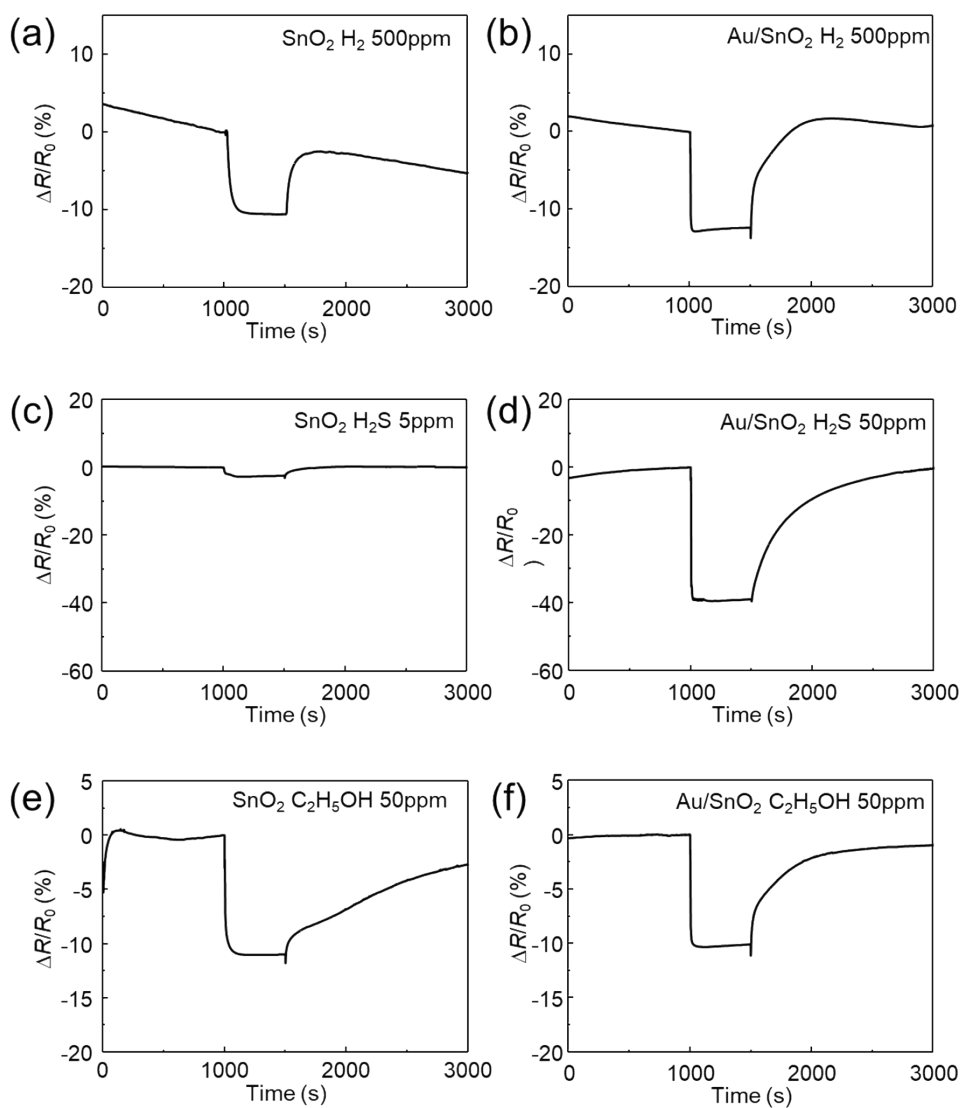

**Figure S10.** Response curves of SnO<sub>2</sub> thin film sensor and the sensor with Au decoration upon exposure to H<sub>2</sub>, H<sub>2</sub>S, and C<sub>2</sub>H<sub>5</sub>OH.

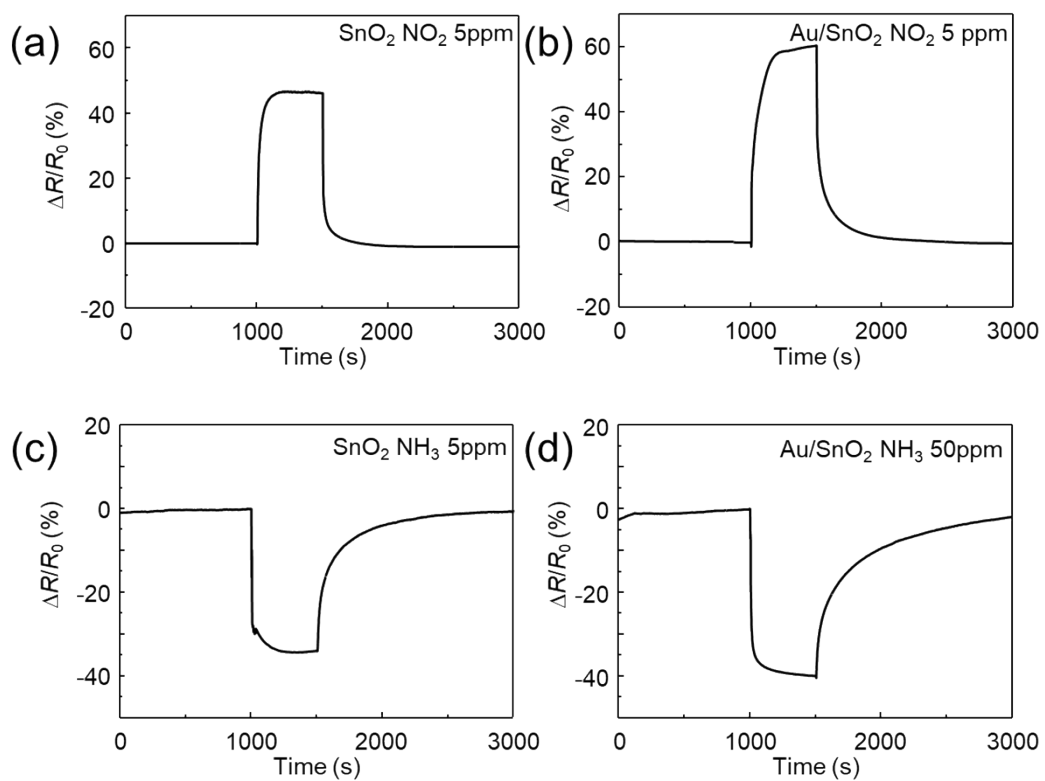

**Figure S11.** Response curves of SnO<sub>2</sub> thin film sensor and the sensor with Au decoration upon exposure to NO<sub>2</sub>, and NH<sub>3</sub>

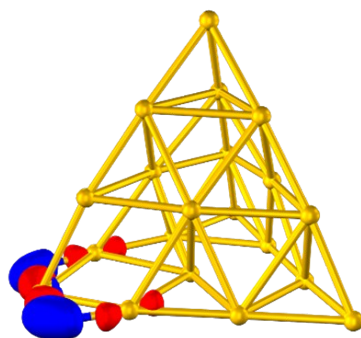

**Figure S12.** Variation of charge density after 2H adsorption; blue and red colors show the regions where charge density is increased and decreased the adsorption.

| Sensing materials | Temp. (°C) | H <sub>2</sub> concentration (ppm) | Ambient        | Gas response | Response time (s) | Recovery time (s) | Flexibility & transparency | Ref.      |
|-------------------|------------|------------------------------------|----------------|--------------|-------------------|-------------------|----------------------------|-----------|
| Au/graphene       | 27         | 500                                | Air            | ~6 %         | 16                | 274               | Flexible and transparent   | This work |
| Pt/CNT            | 27         | 40000                              | Air            | ~16 %        | ~540              | ~5000             | Non                        | 20        |
| Pt/rGO            | 27         | 1000                               | N <sub>2</sub> | ~100 %       | ~600              | ~700              | Non                        | 23        |
| Pt-Pd composites  | 22         | 20000                              | Ar             | ~4.1%        | ~1                | ~10               | Non                        | 28        |
| Pd/graphene       | 27         | 500                                | Air            | ~4 %         | ~250              | ~250              | Non                        | 50        |
| Pd/GNR            | 27         | 500                                | N <sub>2</sub> | ~2.5 %       | ~30               | ~90               | Non                        | 51        |
| Pd/graphene       | 27         | 250                                | Air            | ~3.5 %       | ~100              | ~330              | Non                        | 52        |

**Table S1.** Comparison with hydrogen gas sensing properties of noble metal decorated graphene-based sensors in previous literatures.<sup>20, 23, 28, 53-56</sup>
